# Supplementary material
Source: publisher figshare collection journal article supplement (https://frontiersin.figshare.com/ndownloader/files/34201587)
Supplement: Supplementary file 1 [file 34201587]

Supplementary videos in Results

Supplementary Video 1. A planozygote of *Prorocentrum donghaiense* having four flagella (https://doi.org/10.6084/m9.figshare.18131102).

Supplementary Video 2. A planozygote of *Prorocentrum donghaiense* having two similar flagella (https://doi.org/10.6084/m9.figshare.18131390).
